# Supplementary material for: The Hydrophobic Temperature Dependence of Amino Acids Directly Calculated from Protein Structures
Source: PubMed Central journal article supplement (PMC4441443; doi:10.1371/journal.pcbi.1004277), 2015-05-22
Supplement: pcbi.1004277.s002.pdf [file pcbi.1004277.s002.pdf]

## S1 Text: Description statistics file

Raw counts for each PDB structure per amino acid can be found at <http://www.few.vu.nl/~abeln/hydrophobicT/>. Each row corresponds to a PDB structure. Each column corresponds to a feature of the PDB structure. The identifiers in the header are described below. The statistics are provided per amino acid type, which is indicated by its three letter-code. For example, Alanine is abbreviated as ALA.

- PDB\_chainID: 4-Letter pdb code followed by underscore and one letter indicating which chain is used
- Temperature: Temperature in Kelvin
- XXX\_bur: Number of buried residues of type XXX. Buried is defined as less than 7% solvent accessible area.
- XXX\_unbur: Number of exposed residues of type XXX. Exposed is defined as more than 7% solvent accessible area.
- XXX\_Rsas: The relative solvent accessible area of type XXX. Is defined as  $\text{accessible\_area}/\text{max\_solvent\_accessible\_area}$
- XXX\_Choh: Number of contacts with water for a residues of type XXX. Is defined as  $\text{round}(4 \times \text{accessible\_area}/\text{max\_solvent\_accessible\_area})$
- XXX\_Caa: Number of contacts with other residues for a residues of type XXX. Is defined as  $4 - \text{XXX\_Choh}$ .
